# Supplementary material
Source: publisher figshare collection journal article supplement (https://tandf.figshare.com/articles/dataset/_/26870868)
Supplement: Supplementary file 1 [file 1]

Table S1. List of plant species recorded along roadsides and changes in their presence or absence along the road length during the study period.

| Species name  (Residence:  n – native,  ar – archeophyte,  neo – neophyte,  I – invasive status in the Czech Republic) | Road length with species occurrence relative to total road length studied [%] | | | Statistically significant increase (+) or decrease (-) in frequency for the individual time periods | | |
| --- | --- | --- | --- | --- | --- | --- |
| 1970 | 1994 | 2010 | 1970–1994 | 1994–2010 | 1970–2010 |
| *Aegopodium podagraria* L. (n) | 86 | 96 | 98 | + | n.s. | + |
| *Aethusa cynapium* L.(ar) | 0 | 8 | 5 | + | n.s. | + |
| *Alliaria petiolata* (M. Bieb.) Cavara & Grande *(*n) | 10 | 25 | 32 | + | + | + |
| *Alopecurus pratensis* L.(n) | 81 | 50 | 62 | - | + | - |
| *Amaranthus retroflexus* L.(neo, I) | 0 | 4 | 1 | + | n.s. | n.s. |
| *Angelica sylvestris* L.(n) | 1 | 86 | 82 | + | - | + |
| *Anthriscus nitidus* (Wahlenb.) Hazsl.(n) | 27 | 50 | 57 | + | + | + |
| *Anthriscus sylvestris* (L.) Hoffm.(n) | 40 | 74 | 76 | + | n.s. | + |
| *Arabis glabra* (L.) Bernh.(n) | 2 | 8 | 9 | + | n.s. | + |
| *Arctium* L. sp.(ar) | 0 | 61 | 73 | + | + | + |
| *Armoracia rusticana* G. Gaertner, B. Meyer & Scherbius (ar) | 31 | 42 | 46 | + | n.s. | + |
| *Arrhenatherum elatius* (L.) J.Presl et C.Presl (ar, I) | 75 | 84 | 84 | + | n.s. | + |
| *Artemisia vulgaris* L.(n) | 2 | 82 | 85 | + | n.s. | + |
| *Atriplex patula* L.(ar) | 2 | 53 | 50 | + | n.s. | + |
| *Atriplex sagittate* Borkh.(ar) | 4 | 5 | 0 | + | n.s. | + |
| *Ballota nigra* L.(ar) | 2 | 5 | 3 | n.s. | n.s. | n.s. |
| *Barbarea vulgaris* W.T.Aiton(n) | 7 | 19 | 18 | + | n.s. | + |
| *Bidens frondosus* L.(neo, I) | 0 | 3 | 3 | n.s. | n.s. | + |
| *Bromus hordeaceus* L.(ar) | 0 | 2 | 3 | n.s. | n.s. | n.s. |
| *Bromus inermis* Leyss. (n) | 0 | 3 | 1 | n.s. | n.s. | n.s. |
| *Calamagrostis epigeios* (L.) Roth(n) | 8 | 36 | 48 | + | + | + |
| *Calamagrostis villosa* (Chaix) J.F.Gmel. (n) | 23 | 26 | 26 | n.s. | n.s. | n.s. |
| *Calystegia pulchra* Brummitt & Heywood (neo) | 8 | 1 | 3 | - | n.s. | n.s. |
| *Calystegia sepium* (L.) R.Br.(n) | 0 | 2 | 10 | n.s. | n.s. | + |
| *Campanula rapunculoides* L.(neo) | 24 | 43 | 40 | + | n.s. | + |
| *Campanula trachelium* L.(n) | 15 | 17 | 15 | n.s. | n.s. | n.s. |
| *Carduus acanthoides* L.(ar) | 0 | 0 | 9 | n.s. | + | + |
| *Carduus personata* (L.) Jacq. (n) | 28 | 16 | 28 | - | + | n.s. |
| *Chaerophyllum aromaticum* L.(n) | 49 | 76 | 80 | + | n.s. | + |
| *Chaerophyllum hirsutum* L.(n) | 76 | 67 | 64 | - | n.s. | - |
| *Chaerophyllum temulum* L.(ar) | 1 | 1 | 0 | n.s. | n.s. | n.s. |
| *Chelidonium majus* L.(ar) | 38 | 35 | 36 | n.s. | n.s. | n.s. |
| *Chenopodium album* L.(n) | 2 | 43 | 43 | + | n.s. | + |
| *Chenopodium bonus-henricus* L.(ar) | 15 | 15 | 11 | n.s. | - | n.s. |
| *Chenopodium ficifolium* Sm.(ar) | 0 | 4 | 1 | + | n.s. | n.s. |
| *Cicerbita alpina* (L.) Wallr.(n) | 1 | 3 | 5 | n.s. | + | + |
| *Cichorium intybus* L.(ar) | 18 | 5 | 5 | - | n.s. | - |
| *Cirsium arvense* (L.) Scop.(ar) | 0 | 49 | 48 | + | n.s. | + |
| *Cirsium canum* (L.) All.(n) | 4 | 8 | 12 | + | n.s. | + |
| *Cirsium oleraceum* (L.) Scop.(n) | 48 | 53 | 67 | n.s. | + | + |
| *Cirsium vulgare* (Savi) Terr.(ar) | 0 | 2 | 2 | n.s. | n.s. | n.s. |
| *Conyza canadensis* (L.) Cronquist(neo, I) | 1 | 14 | 16 | + | n.s. | + |
| *Cruciata laevipes* Opiz(n) | 7 | 6 | 5 | n.s. | n.s. | n.s. |
| *Daucus carota* L.(n) | 1 | 20 | 19 | + | n.s. | + |
| *Epilobium dodonaei* Vill.(neo) | 0 | 0 | 3 | n.s. | n.s. | n.s. |
| *Echium vulgare* L.(ar) | 2 | 3 | 7 | n.s. | n.s. | + |
| *Elymus repens* (L.) Gould(n) | 2 | 79 | 80 | + | n.s. | + |
| *Erigeron annuus* (L.) Desf.(neo) | 0 | 9 | 9 | + | n.s. | + |
| *Erysimum cheiranthoides* L.(ar) | 5 | 18 | 17 | + | n.s. | + |
| *Euphorbia cyparissias* L.(n) | 5 | 2 | 5 | n.s. | n.s. | n.s. |
| *Galinsoga parviflora* Cav.(neo, I) | 0 | 20 | 19 | + | n.s. | + |
| *Galinsoga quadriradiata* Ruiz & Pav.(neo, I) | 0 | 23 | 21 | + | n.s. | + |
| *Galium aparine* L.(n) | 22 | 27 | 57 | n.s. | + | + |
| *Geranium phaeum* L.(n) | 10 | 4 | 8 | n.s. | n.s. | n.s. |
| *Geranium pratense* L.(n) | 29 | 56 | 55 | + | n.s. | + |
| *Geranium pyrenaicum* Burm. f.(neo, I) | 1 | 2 | 1 | n.s. | n.s. | n.s. |
| *Geranium robertianum* L.(n) | 52 | 45 | 49 | n.s. | n.s. | n.s. |
| *Geranium sylvaticum* L.(n) | 41 | 45 | 43 | n.s. | n.s. | n.s. |
| *Geum urbanum* L.(n) | 36 | 53 | 63 | + | + | + |
| *Glechoma hederacea* L.(n) | 37 | 64 | 62 | + | n.s. | + |
| *Helianthus tuberosus* L.(neo, I) | 0 | 0 | 1 | n.s. | n.s. | n.s. |
| *Heracleum mantegazzianum* Sommier & Levier(neo, I) | 5 | 12 | 2 | + | - | n.s. |
| *Heracleum sphondylium* L.(n) | 2 | 90 | 92 | + | n.s. | + |
| *Hylotelephium maximum* (L.) Holub(n) | 18 | 29 | 20 | + | - | n.s. |
| *Impatiens glandulifera* Royle(neo, I) | 0 | 1 | 5 | n.s. | n.s. | + |
| *Impatiens parviflora* DC.(neo, I) | 9 | 39 | 55 | + | + | + |
| *Knautia arvensis* (L.) Coult(n) | 1 | 49 | 64 | + | + | + |
| *Lactuca serriola* L. (ar) | 1 | 14 | 13 | + | n.s. | + |
| *Lamium album* L.(ar) | 27 | 32 | 27 | n.s. | n.s. | n.s. |
| *Lamium maculatum* L.(n) | 14 | 2 | 4 | - | n.s. | - |
| *Lapsana communis* L.(ar) | 42 | 36 | 34 | n.s. | n.s. | n.s. |
| *Lathyrus pratensis* L.(n) | 19 | 1 | 29 | n.s. | + | n.s. |
| *Leonurus cardiaca* L.(ar) | 6 | 5 | 4 | n.s. | n.s. | n.s. |
| *Leucanthemum vulgare* aggr*.* (n) | 74 | 28 | 69 | - | + | n.s. |
| *Linaria vulgaris* Mill.(ar) | 2 | 7 | 6 | + | n.s. | n.s. |
| *Malva neglecta* Wallr.(ar) | 0 | 3 | 1 | + | n.s. | n.s. |
| *Melilotus albus* Medik.(ar) | 23 | 20 | 18 | n.s. | n.s. | n.s. |
| *Melilotus officinalis* (L.) Lam.(ar) | 3 | 4 | 5 | n.s. | n.s. | n.s. |
| *Myrrhis odorata* (L.) Scop.(neo) | 43 | 35 | 33 | - | n.s. | - |
| *Oenothera biennis* L.(neo, I) | 1 | 3 | 1 | n.s. | n.s. | n.s. |
| *Pastinaca sativa* L.(ar) | 9 | 3 | 6 | - | n.s. | n.s. |
| *Peucedanum ostruthium* (L.) W.D.J.Koch(neo) | 25 | 9 | 10 | - | n.s. | - |
| *Petasites albus* (L.) Gaertn.(n) | 42 | 35 | 46 | n.s. | + | n.s. |
| *Petasites hybridus* (L.) G.Gaertn.(n) | 60 | 48 | 48 | - | n.s. | - |
| *Polygonum aviculare* L.(ar) | 2 | 39 | 28 | + | - | + |
| *Potentila anserina* L.(n) | 2 | 51 | 57 | + | + | + |
| *Ranunculus platanifolius* L.(n) | 23 | 10 | 11 | - | n.s. | - |
| *Reynoutria japonica* Houtt.(neo, I) | 0 | 29 | 22 | + | n.s. | + |
| *Reynoutria sachalinensis* (F. Schmidt) Nakai(neo, I) | 0 | 0 | 1 | n.s. | n.s. | n.s. |
| *Rubrivena polystachya* (Meisn.) M.Král(neo, I) | 0 | 2 | 3 | n.s. | n.s. | + |
| *Rubus caesius* L.(n) | 58 | 12 | 16 | - | + | - |
| *Rubus ideaus* L.(n) | 0 | 22 | 23 | + | n.s. | + |
| *Rudbeckia laciniata* L.(neo, I) | 11 | 12 | 12 | n.s. | n.s. | n.s. |
| *Rumex alpinus* L.(neo) | 14 | 11 | 11 | - | n.s. | - |
| *Rumex obtusifolius* L.(n) | 3 | 89 | 92 | + | n.s. | + |
| *Rumex thyrsiflorus* Fingerh.(neo, I) | 3 | 51 | 61 | + | + | + |
| *Saponaria officinalis* L.(ar) | 8 | 14 | 13 | n.s. | n.s. | n.s. |
| *Silene latifolia* Poir(ar) | 30 | 39 | 42 | n.s. | n.s. | + |
| *Sisymbrium officinale* (L.) Scop.(ar) | 1 | 24 | 23 | + | n.s. | + |
| *Solidago canadensis* L.(neo, I) | 2 | 14 | 10 | + | - | + |
| *Solidago gigantea* Aiton(neo, I) | 12 | 16 | 14 | n.s. | n.s. | n.s. |
| *Tanacetum vulgare* L.(ar, I) | 2 | 63 | 71 | + | + | + |
| *Telekia speciosa* (Schreb.) Baumg.(neo, I) | 5 | 35 | 43 | + | + | + |
| *Thlaspi arvense* L.(ar) | 7 | 19 | 26 | + | + | + |
| *Torilis japonica* (Houtt.) DC.(n) | 9 | 10 | 7 | n.s. | n.s. | n.s. |
| *Tripleurospermum inodorum* (L.) Sch.Bip. (ar, I) | 21 | 61 | 65 | + | n.s. | + |
| *Urtica dioica* L.(n) | 2 | 96 | 100 | + | + | + |
